# Supplementary material for: Porphyrin ring contraction: a one-pot reaction leading to divalent corrolesElectronic supplementary information (ESI) available: experimental procedures for syntheses of corrole 4 and ketone 3 (R = OEt), and for preparing 4 from 11 (R = H). See http://www.rsc.org/suppdata/cc/b4/b400812j/
Source: Royal Society of Chemistry journal article supplement (doi:10.1039/b400812j), 2004-01-01
Supplement: b400812j.doc [file b400812j.doc]

**Porphyrin ring contraction: a one-pot reaction leading to divalent corroles**

**Christophe Jeandon, Romain Ruppert, and Henry J. Callot***

Faculté de Chimie, 1 rue Blaise Pascal, 67000 Strasbourg, France. E-mail: callot@chimie.u-strasbg.fr

**Electronic Supplementary Information**

**Ring contraction of nickel porphyrin 1 (R = OEt)**

1. Two step procedure

Nickel porphyrin **1** (R = OEt) (40 mg; 0.048 mmol), benzoic anhydride (100 mg; 0.41 mmol) were dissolved in CHCl3 (15 mL; distilled from P2O5) and SnCl4 (0.4 mL) was added at once. The flask was stoppered and the solution was stirred until full conversion of the starting material (ca 3 days at +20°C or 10 h under reflux). The solution was poured into a large excess of aqueous NaHCO3 and stirred for 30 min (colour changed from brown to green), then decanted and washed three times with water, dried over Na2SO4 and evaporated. To the green residue in a 25 mL round-bottomed flask was added dimethylaminopyridine (10 mg; 0.82 mmol), benzoic anhydride (40 mg; 0.16 mmol) and pyridine (10 mL). The resulting solution was stirred under an dry air atmosphere for 4h. Pyridine was evaporated under vacuum, then toluene (three times 10 mL) was added and evaporated under vacuum to eliminate the last traces of pyridine. The residue was chromatographed (silica gel; 100 mL in toluene). Elution with the same solvent gave corrole **4** (10 mg; 21 %) after crystallization from CH2Cl2-CH3OH. Ketone **3** was then eluted and isolated in similar yield (crystallized from CH2Cl2-CH3OH).

2. One-pot reaction

The same acylation procedure was followed but the hydrolysis step was not performed and the brown solution evaporated under vacuum. The residue was treated as above with benzoic anhydride and dimethylaminopyridine in pyridine but the highest yield of corrole **4** (15 %; isolation procedure as above) was obtained after a longer reaction time (16 h).

Corrole **4** (R = OEt)

NMR (CDCl3): 7.54 (d, 1H, *J =* 9 Hz, cyclised phenyl), 7.51 (d, 2H, *J =* 8.4 Hz, phenyl), 7.48 (d, 1H, *J =* 8.4 Hz, phenyl), 7.18-7.30 (m, 11H, 10 phenyl and EtO-phenyl, 1 pyrrole H), 6.93 (t, 1H, *J =* 7.5 Hz, phenyl *para*-H), 6.88 and 6.83 (2d, 2+2H, *J =* 9 Hz, EtO-phenyl), 6.62 (dd, 1H, *J =* 3 and 9 Hz, cyclised phenyl), 6.58 (d, 1H, *J =* 5.1 Hz, pyrrole), 6.19 (d, 1H, *J =* 3 Hz, cyclised phenyl), 6.10 (d, 1H, *J =* 4.8 Hz, pyrrole), 5.91 (d, 1H, J= 4.5 Hz, pyrrole), 5.87 (d, 1H, *J =* 4.5 Hz, pyrrole), 5.72 (d, 1H, *J =* 4.8 Hz, pyrrole), 4.07, 4.03 and 3.68 (3q, 2+2+2H, *J =* 7 Hz, CH2), 1.44, 1.41 and 1.22 (3t, 3+3+3H, *J =* 7 Hz, CH3). UV-visible (CH2Cl2):  = 394 nm ( = 53000), 494 (43000), 555 (sh., 18000), 600 (28000), 702 (12600), 766 (22000).


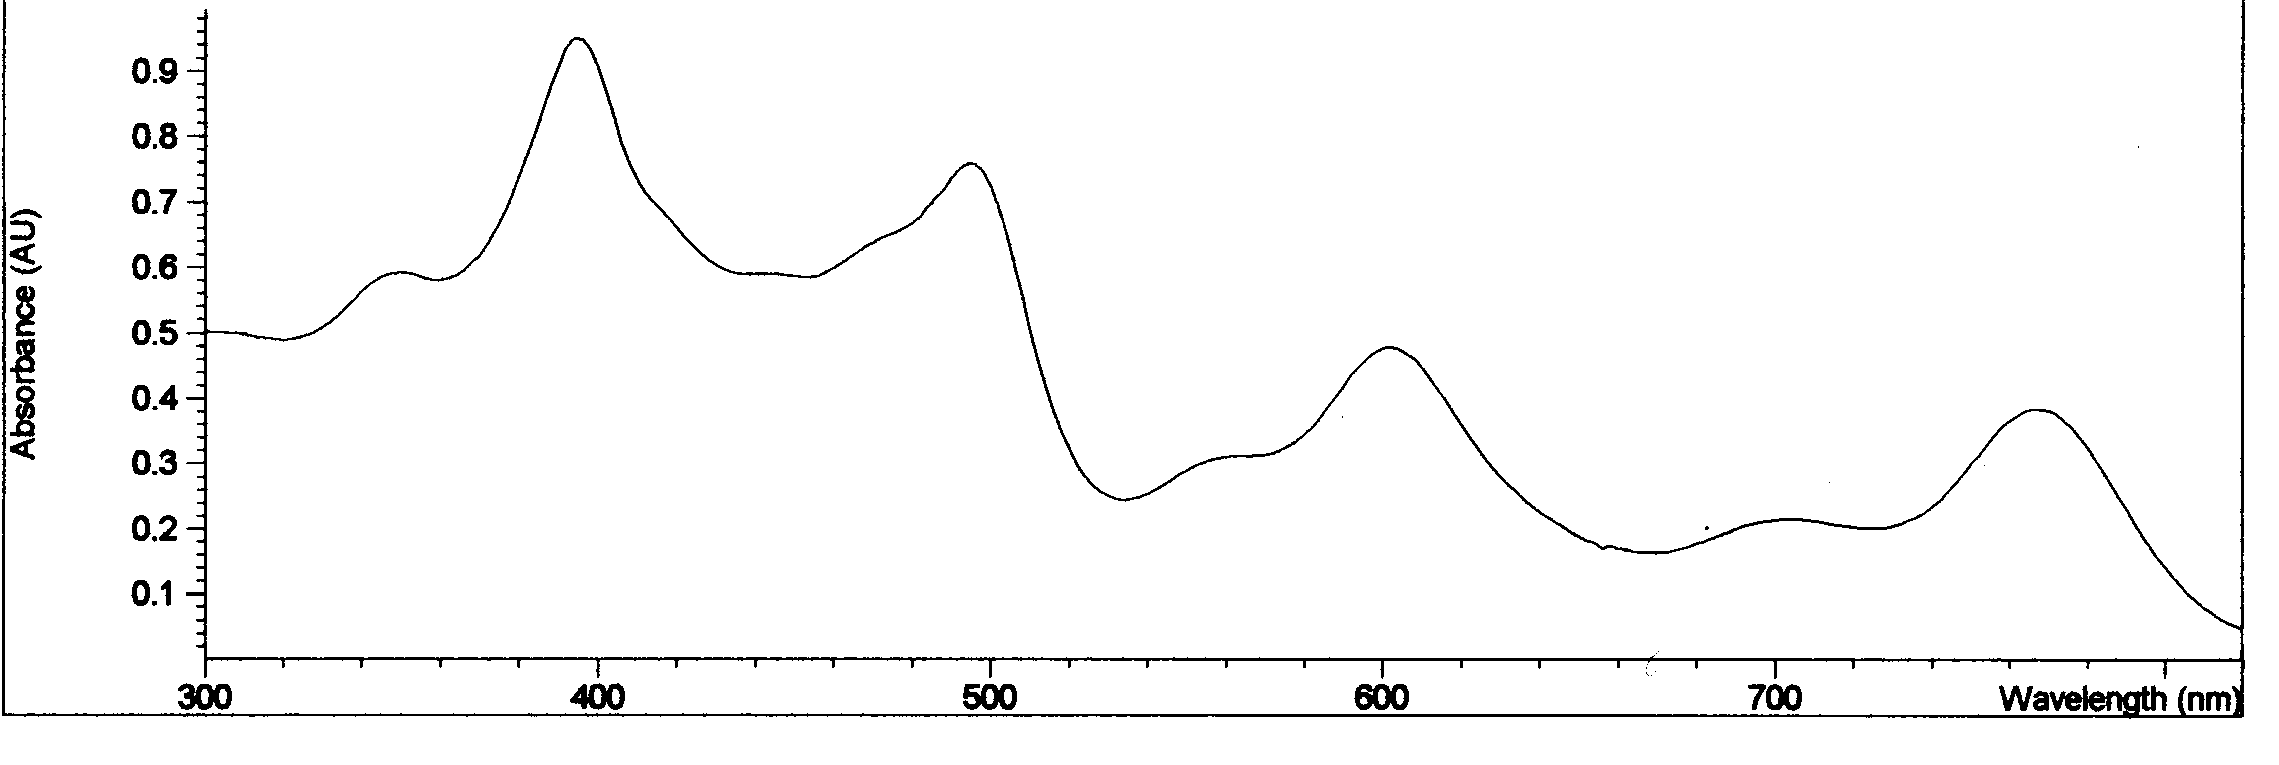


UV-visible spectrum (CH2Cl2) of corrole **4** (R = OEt)

Ketone **3** (R = OEt)

NMR (CDCl3): 8.84 (d, 1H, *J =* 4.5 Hz, pyrrole), 8.52 (d, 1H, *J =* 4.5 Hz, pyrrole), 8.38 (d, 1H, *J =* 9.3 Hz, cyclised phenyl), 8.16 (d, 1H, *J =* 5.2 Hz, pyrrole), 8.10 (d, 1H, *J =* 5.2 Hz, pyrrole), 8.02 (d, 1H, *J =* 4.8 Hz, pyrrole), 7.93 (d, 1H, *J =* 4.8 Hz, pyrrole), 7.79, 7.71, 7.40, 7.17, 7.11, 7.00 (6d, 2+2+2+2+2+2H, *J =* 9 Hz, phenyl-OEt), 7.5-7.6 (m, 5H, phenyl), 7.41 (dd, 1H, *J =* 9.3 and 3 Hz, cyclised phenyl), 7.24 (d, 1H, *J =* 3 Hz, cyclised phenyl), 4.25, 4.22, 4.14, 4.02 (4q, 2+2+2+2H, *J =* 7 Hz, ethyl CH2), 1.56, 1.53, 1.48, 1.41 (4t, 3+3+3+3H, *J =* 7 Hz, ethyl CH3). UV-visible (CH2Cl2):  = 420 nm ( = 101000), 472 (41000), 500 (36000), 680 (sh., 14000), 722 (27000).


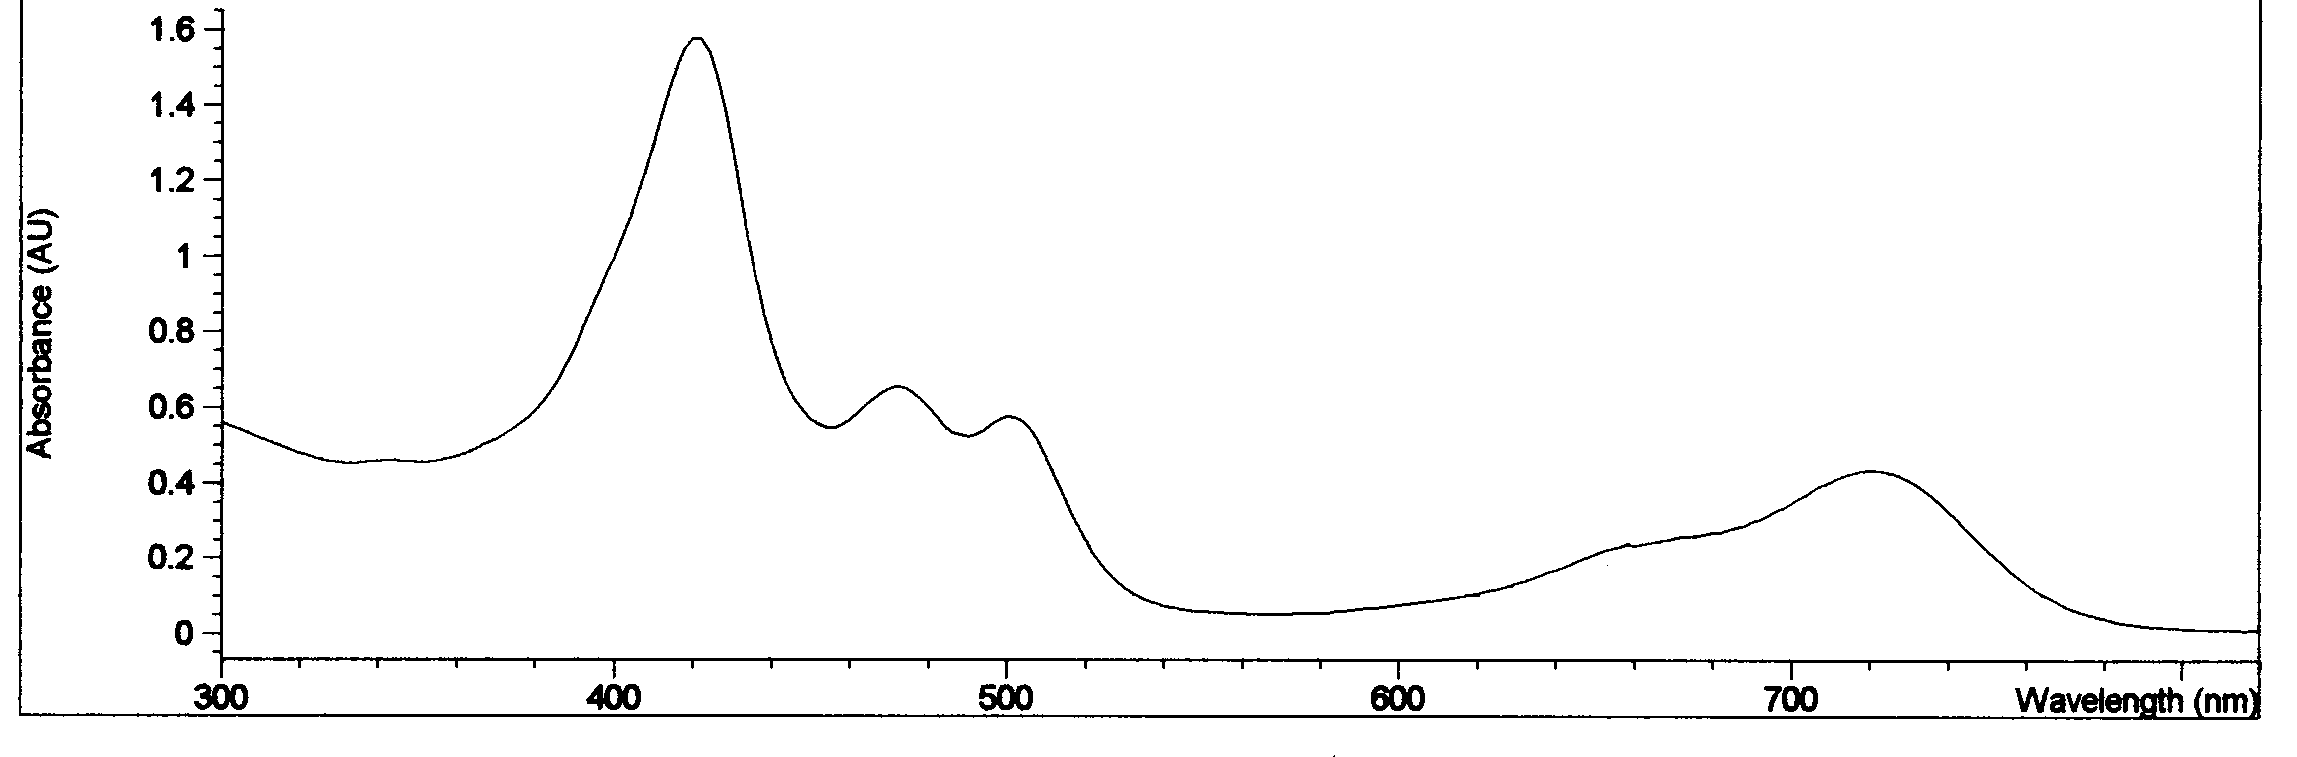


UV-visible spectrum (CH2Cl2) of ketone **3** (R = OEt)

**Conversion of ketone 10 into corrole 4 (R = H)**

To a solution of ketone **10** (40 mg; 0.056 mmol) in dry CH2Cl2 (8 mL) were added CuI (8 mg; 0.042 mmol) followed by a solution of phenylmagnesium bromide (0.66 mmole in 4 mL ethyl ether) over 2 min (TLC showed that full transformation of the starting material occurred). The reaction mixture was diluted with CH2Cl2 (100 mL) and poured into aqueous HCl (250 mL; 2M). The organic phase was washed with water (3x500 mL), dried over Na2SO4 and evaporated. To the residue were added benzoic anhydride (80 mg; 0.082 mmol), dimethylaminopyridine (10 mg; 0.082 mmol), then pyridine (10 mL). The solution was stirred under dry air for 1 h, then evaporated under vacuum. Toluene (3x 10 mL) was added and evaporated under vacuum to eliminate the last traces of pyridine. The residue was chromatographed (silica gel; 75 mL in toluene). Elution with the same solvent gave corrole **4** (5 mg; 11 %) after crystallization from CH2Cl2-CH3OH. Ketone **3** was then eluted (15 mg; 34 %; crystallized from CH2Cl2-CH3OH).

Corrole **4** (R = H)

NMR (CDCl3): 7.63 (d, 1H, *J =* 9 Hz, cyclised phenyl), 7.50-7.55 (m, 3H, phenyl), 7.20-7.40 (m, 16H, 15 phenyl + 1 pyrrole H), 7.12 (t, 2H, *J =* 8.1 Hz, phenyl), 6.95 (tt, 1H, *J =* 9, 1.5 and 1.5 Hz, phenyl p-H), 6.81 (dd, 1H, *J =* 8.4 and 1 Hz, cyclised phenyl), 6.66 (ddd, 1H, *J =* 9, 9 and 1 Hz, cyclised phenyl), 6.63 (d, 1H, *J =* 5.1 Hz, pyrrole), 6.12 (d, 1H, *J =* 5.1 Hz, pyrrole), 5.97 (d, 1H, *J =* 4.5 Hz, pyrrole), 5.89 (d, 1H, *J =* 5.1 Hz, pyrrole), 5.83 (d, 1H, *J =* 4.5 Hz, pyrrole).

UV-visible (CH2Cl2):  = 384 nm ( = 48500), 488 (27000), 552 (sh., 12000), 596 (19500), 700 (8200), 760 (14700).

Ketone **3** (R = H)

NMR (CDCl3): 8.92 (d, 1H, *J =* 5.1 Hz, pyrrole), 8.51 (d, 1H, *J =* 5.1 Hz, pyrrole), 8.45 (dd, 1H, *J =* 9 and 1 Hz, cyclised phenyl), 8.15 (d, 1H, *J =* 5.1 Hz, pyrrole), 8.07 (d, 1H, *J =* 4.8 Hz, pyrrole), 8.00 (d, 1H, *J =* 4.8 Hz, pyrrole), 7.91 (d, 1H, *J =* 5.1 Hz, pyrrole), 7.45-7.9 (m, 23H, phenyl). UV-visible (CH2Cl2):  = 412nm ( = 65000), 464 (39000), 490 (36000), 680 (sh., 13000), 714 (16800).

All compounds gave satisfactory MS and analytical data.
